# Supplementary material for: Large-area, green solvent spray deposited nickel oxide films for scalable fabrication of triple-cation perovskite solar cells
Source: Royal Society of Chemistry journal article supplement (doi:10.1039/c9ta13528f), 2020-01-01
Supplement: c9ta13528f1.pdf [file c9ta13528f1.pdf]

# **Large-area, Green Solvent Spray Deposited Nickel Oxide Films for Scalable Fabrication of Triple-Cation Perovskite Solar Cells**

*Neetesh Kumar<sup>1</sup>, Hock Beng Lee<sup>1</sup>, Sunbin Hwang<sup>2</sup> and Jae-Wook Kang<sup>1\*</sup>*

<sup>1</sup>Department of Flexible and Printable Electronics, LANL-CBNU Engineering Institute-Korea,  
Chonbuk National University, Jeonju 54896, Republic of Korea.

<sup>2</sup>Functional Composite Materials Research Center, Institute of Advanced Composite Materials,  
Korea Institute of Science and Technology, Wanju-gun 55324, Republic of Korea

\*Corresponding author: Prof. Jae-Wook Kang

E-mail: [jwkang@jbnu.ac.kr](mailto:jwkang@jbnu.ac.kr)

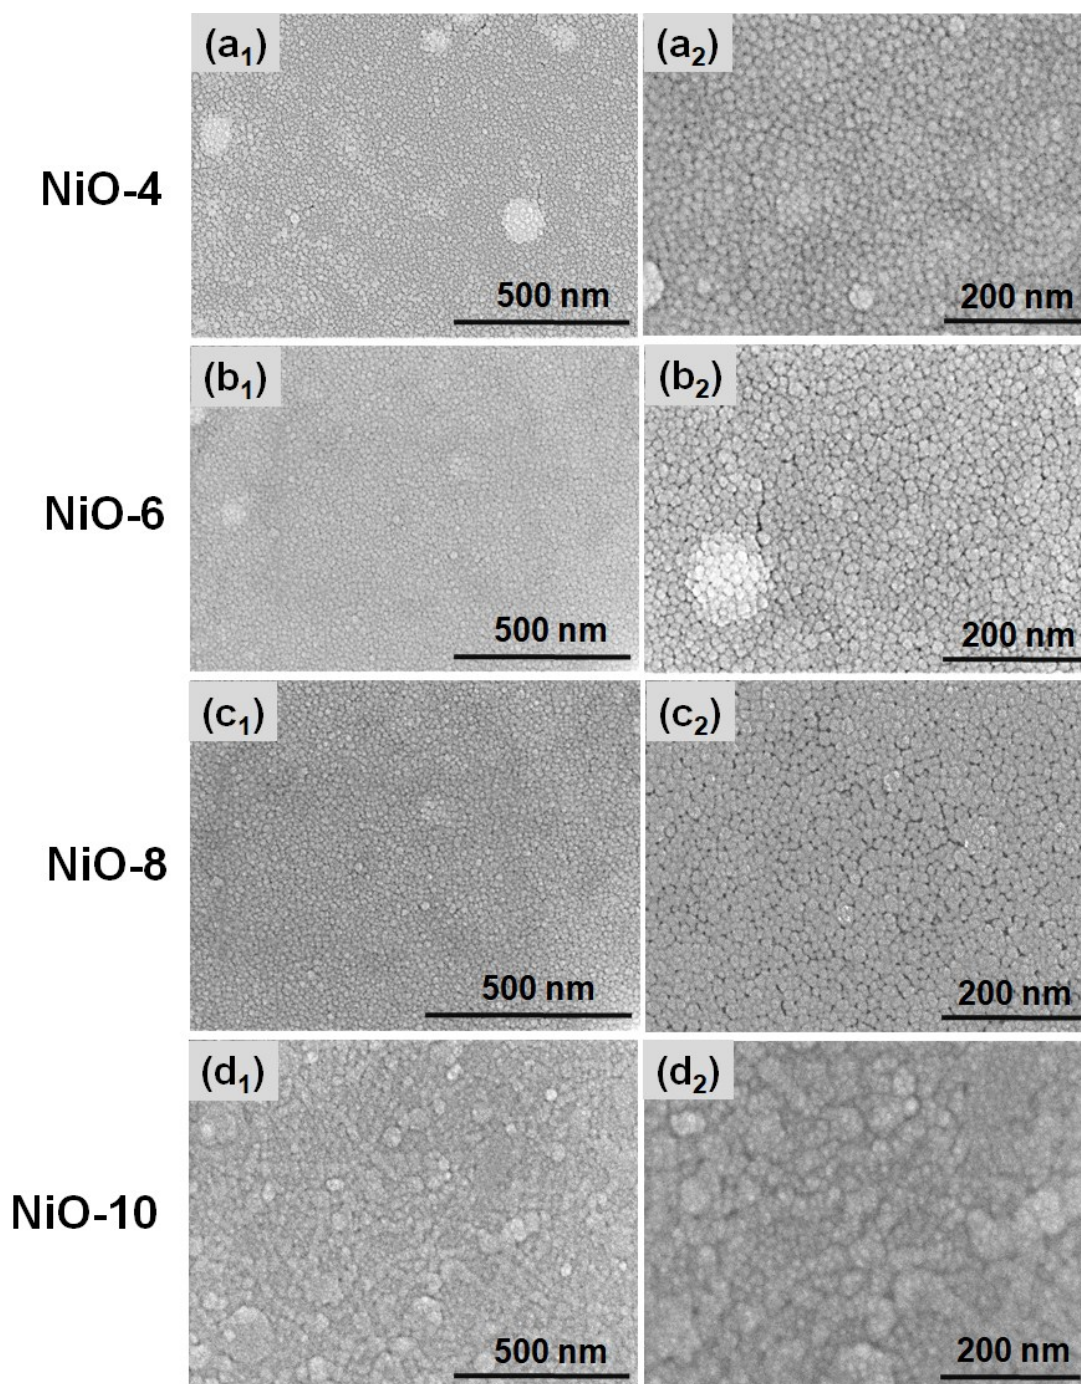

**Fig. S1.** Low and high magnification FE-SEM images of spray deposited NiO films on ITO substrates showing the change in surface morphology with spray cycles. (a<sub>1</sub>, a<sub>2</sub>) 4 spray cycles, (b<sub>1</sub>, b<sub>2</sub>) 6-spray cycles, (c<sub>1</sub>, c<sub>2</sub>) 8-spray cycles, and (d<sub>1</sub>, d<sub>2</sub>) 10-spray cycles.

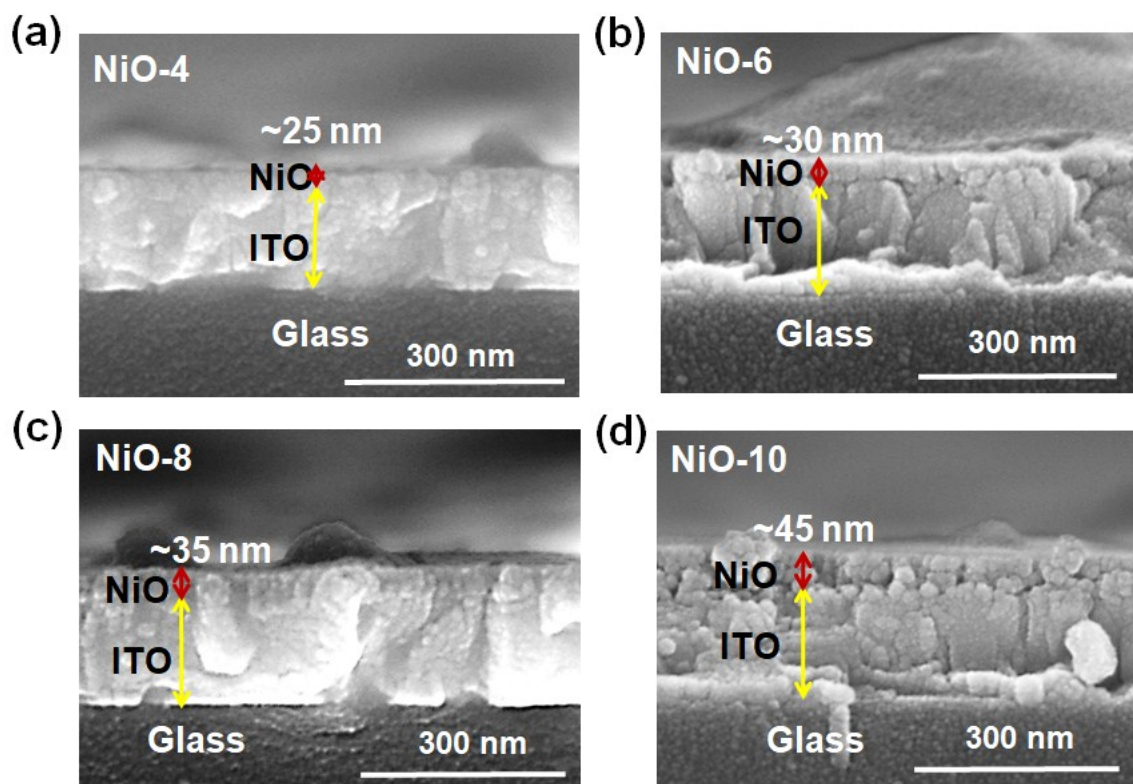

**Fig. S2.** Cross-sectional FE-SEM images of (a) NiO-4, (b) NiO-6, (c) NiO-8 and (d) NiO-10 films deposited on ITO substrates.

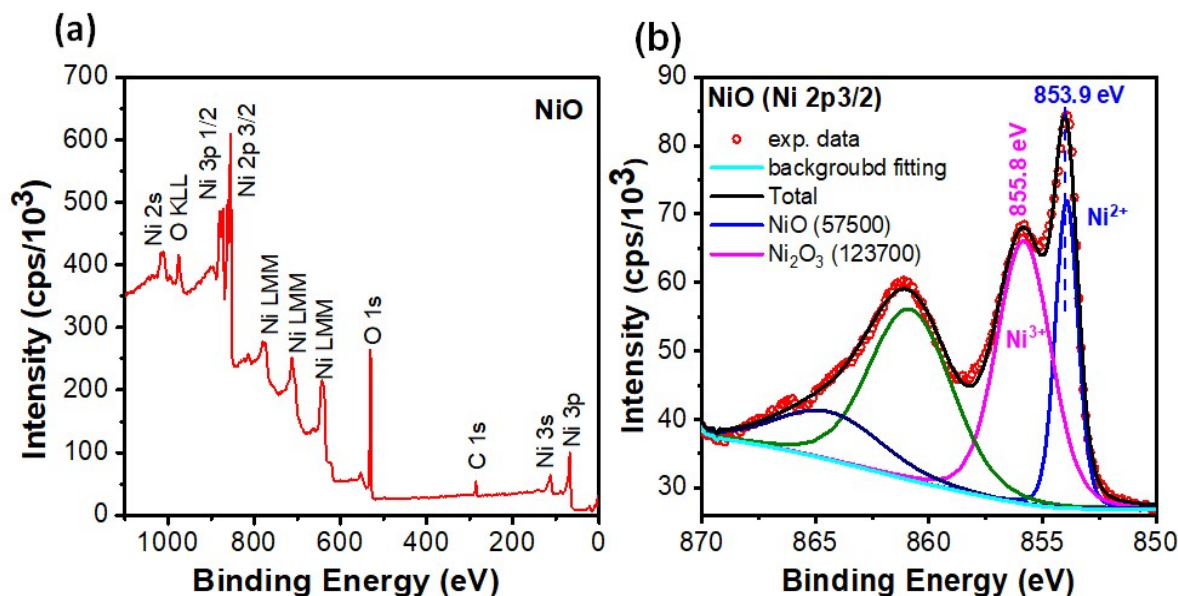

**Fig. S3.** (a) Representative wide-scan XPS survey spectrum and (b) high resolution scan spectra of the Ni 2p<sub>3/2</sub> peak of NiO thin film.

### UPS Analysis

The energy levels of NiO were examined via UPS analysis. The energy difference ( $E_i$ ) between the valence band maximum ( $E_{VB}$ ) and  $E_F$  is derived from the low binding energy tails. The work function, or Fermi level ( $E_F$ ) of the charge carrier extraction layers are obtained by subtracting the binding energies of the secondary electron cutoffs from the excitation energy (21.22 eV) of He<sup>I</sup> UPS spectra. The position of the valence band was confirmed using the equation  $E_{VB} = 21.22 - (E_{cutoff} - E_i)$ . Based on the tails at low binding energy, the energy difference ( $E_i$ ) between Fermi level ( $E_F$ ) and the valence band maximum ( $E_{vb}$ ) is about ~0.36 eV, and the work function or Fermi level was approximately -4.52 eV. This was determined by subtracting the  $E_{cut-off}$  (16.7 eV) from the excitation energy (21.22 eV) of He<sup>I</sup>. The position of the valence band (VB) energy level was an energy of -4.88 eV. After determining the  $E_{VB}$ , the conduction band ( $E_{CB}$ ) energy level can be obtained easily by adding the optical band gap (~3.70 eV) to the  $E_{VB}$  (~-4.88 eV). Therefore, the  $E_{CB}$  of the NiO film was approximately -1.18 eV.



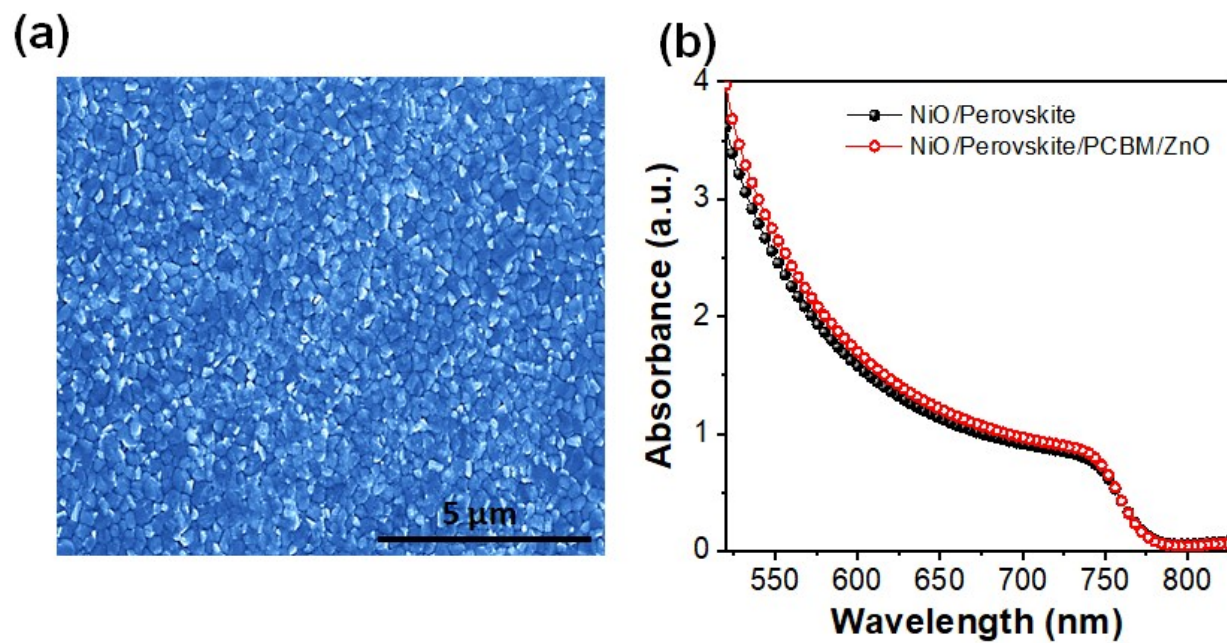

**Fig. S4.** (a) Low-magnification FESEM images of perovskite films deposited on the top NiO-8 HTL and (b) absorbance spectra with HTL and HTL-ETL layers.

### TRPL analysis:

The TRPL decay parameters were obtained by fitting the decay profile data using the bi-exponential function as:

$$Y(t) = A_1 \exp\left(-\frac{t-t_0}{\tau_1}\right) + A_2 \exp\left(-\frac{t-t_0}{\tau_2}\right) + Y_0 \quad (1)$$

Here,  $\tau_1$  and  $\tau_2$  are the first and second order decay times, and  $A_1$  and  $A_2$  are the respective weight factors of each decay channel. The fast-decay time ( $\tau_1$ ) indicates the non-radiative decay, and the slow-decay ( $\tau_2$ ) indicates the radiative decay, which originated from the recombination of charge carriers and free-charge carriers before the collection, respectively. The average recombination lifetime  $\langle\tau_{avg}\rangle$  was calculated from the following equation:

$$\langle\tau_{avg}\rangle = \frac{A_1\tau_1^2 + A_2\tau_2^2}{A_1\tau_1 + A_2\tau_2} \quad (2)$$

**Table S1.** TRPL lifetime measurements of perovskite absorber deposited on an ITO/NiOx-8 coated substrate. Weight fraction calculated from the amplitude at a particular lifetime decay.

| Sample                 | $\tau_1$<br>(ns) | $\tau_2$<br>(ns) | $A_1$  | $A_2$  | $\langle\tau\rangle$<br>(ns) |
|------------------------|------------------|------------------|--------|--------|------------------------------|
| ITO/pero.              | 2.058            | 15.891           | 0.2138 | 0.3467 | 14.85                        |
| ITO/NiO/pero.          | 1.271            | 10.540           | 0.2454 | 0.3113 | 9.73                         |
| ITO/NiO/Pero./PCBM/ZnO | 1.232            | 9.0310           | 0.3411 | 0.2684 | 7.87                         |

**Table S2.** Summary of device parameters  $V_{OC}$ ,  $J_{SC}$ , FF, and PCE of the inverted PSCs using undoped spray deposited NiO or NiO<sub>x</sub> HTLs with device configurations and antisolvents used for depositing the perovskite layer.

| HTL | Method (solvent)              | Anti-Solvent (vol.)                       | Perovskite System                                                                                                                                                   | $V_{oc}$ (V) | $J_{sc}$ (mA cm <sup>-1</sup> ) | FF (%) | PCE (%) | Ref.             |
|-----|-------------------------------|-------------------------------------------|---------------------------------------------------------------------------------------------------------------------------------------------------------------------|--------------|---------------------------------|--------|---------|------------------|
| NiO | Spray <sup>a</sup>            | Toluene (800 $\mu$ L)                     | FTO/NiO/MAPbI <sub>3</sub> /PCBM/TiO <sub>x</sub> /Ag                                                                                                               | 1.03         | 18.70                           | 64.0   | 12.4    | [1]              |
| NiO | Spray <sup>a</sup>            | Toluene (800 $\mu$ L)                     | FTO/NiO/MAPbI <sub>3</sub> /PCBM/BCP/Ag                                                                                                                             | 1.09         | 20.26                           | 74.8   | 16.6    | [2]              |
| NiO | Spray <sup>a</sup>            | Toluene (800 $\mu$ L)                     | FTO/NiO-Al <sub>2</sub> O <sub>3</sub> /MAPbI <sub>3</sub> /PCBM/BCP/Ag                                                                                             | 1.04         | 18.0                            | 72.0   | 13.5    | [3]              |
| NiO | Spray Combustion <sup>b</sup> | Methylbenzene <sup>e</sup> (1000 $\mu$ L) | FTO/NiO/MAPbI <sub>3</sub> /PCBM//Ag                                                                                                                                | 1.03         | 17.42                           | 71.2   | 12.7    | [4]              |
| NiO | Ultrasonic Spray <sup>c</sup> | N <sub>2</sub> gas assisted conversion    | ITO/NiO/<br>Cs <sub>0.17</sub> FA <sub>0.83</sub> Pb(Br <sub>0.17</sub> I <sub>0.83</sub> ) <sub>3</sub> /C <sub>60</sub> /BCP/Ag<br>(Cs- containing Double cation) | 1.02         | 19.7                            | 76.0   | 16.2    | [5]              |
| NiO | Spray <sup>d</sup>            | EA-Hex (100 $\mu$ L)                      | ITO/NiO/(FAPbI <sub>3</sub> ) <sub>0.85</sub> (MAPbBr <sub>3</sub> ) <sub>0.15</sub> /PCBM/ZnO/Ag<br>(Cs-containing Tripe cation)                                   | 1.10         | 22.6                            | 73.0   | 17.3    | <b>This work</b> |

Where, <sup>a</sup> acetonitrile + ethanol (95:5 v%), <sup>b</sup> ethanol + acetylacetone, <sup>c</sup> deionized water, <sup>d</sup> ethanol + DI water (80:20 v%).

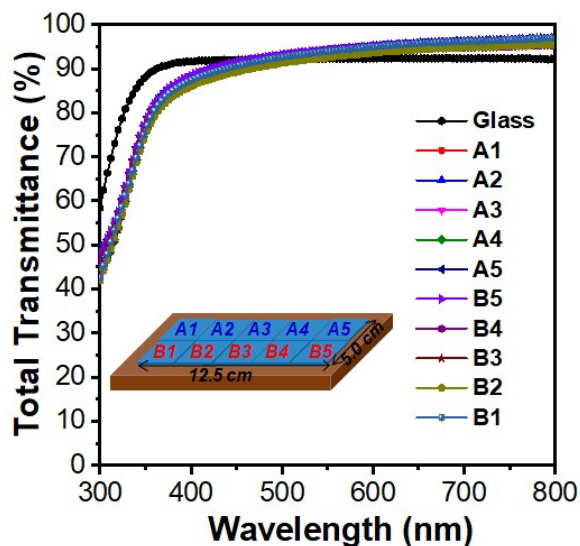

**Fig. S5.** Transmittance spectra of A1-A5 and B1-B5 samples deposited for 8 spray cycles

**Table S3.** Performance of perovskite devices fabricated on spray deposited large-area NiO-8 (62.5 cm<sup>2</sup>) films (total 10 samples in two rows). The PSC devices are designated as 1 to 10.

| Device | $J_{sc}$            | $V_{oc}$ | FF    | PCE   | $R_s$        | $R_{sh}$     |
|--------|---------------------|----------|-------|-------|--------------|--------------|
|        | mA cm <sup>-2</sup> | (V)      | (%)   | (%)   | ( $\Omega$ ) | ( $\Omega$ ) |
| 1      | 22.60               | 1.04     | 71.1  | 17.00 | 49.0         | 30515        |
| 2      | 21.94               | 1.06     | 70.96 | 16.66 | 50.3         | 23846        |
| 3      | 21.62               | 1.06     | 70.83 | 16.36 | 50.3         | 24606        |
| 4      | 21.81               | 1.06     | 70.97 | 16.51 | 49.3         | 23730        |
| 5      | 21.99               | 1.05     | 72.23 | 16.66 | 52.7         | 34080        |
| 6      | 22.92               | 1.06     | 70.27 | 17.23 | 49.9         | 26683        |
| 7      | 22.75               | 1.06     | 71.16 | 17.14 | 45.6         | 25493        |
| 8      | 22.56               | 1.06     | 71.58 | 17.06 | 45.6         | 26075        |
| 9      | 21.85               | 1.05     | 72.07 | 16.57 | 55.2         | 33276        |



10                      21.78                      1.05                      71.80                      16.49                      56.2                      26145

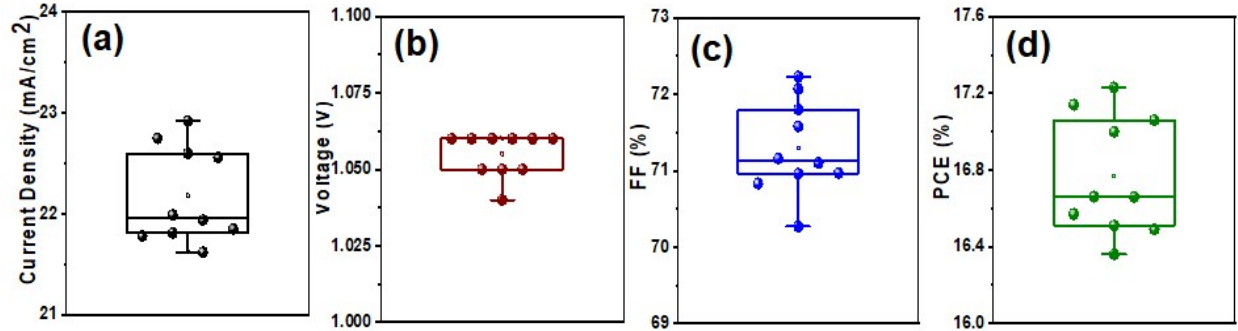

**Fig. S6.** Box plot of device parameters for samples A1-A5 and B1-B5.

**Table S4.** Performance of perovskite solar cells with variations in the active areas of the device.

| Aperture<br>Area<br>(cm <sup>2</sup> ) | J <sub>sc</sub><br>(mA cm <sup>-2</sup> ) | V <sub>oc</sub><br>(V) | FF<br>(%) | PCE<br>(%) | R <sub>s</sub><br>(Ω cm <sup>2</sup> ) | R <sub>sh</sub><br>(Ω cm <sup>2</sup> ) |
|----------------------------------------|-------------------------------------------|------------------------|-----------|------------|----------------------------------------|-----------------------------------------|
| 0.07                                   | 22.75                                     | 1.06                   | 71.16     | 17.14      | 3.2                                    | 1284.5                                  |
| 0.09                                   | 22.56                                     | 1.05                   | 71.58     | 16.96      | 3.3                                    | 1780.4                                  |
| 0.52                                   | 22.76                                     | 1.07                   | 56.90     | 13.93      | 11.32                                  | 751.7                                   |
| 1.04                                   | 22.51                                     | 1.06                   | 51.23     | 12.22      | 14.56                                  | 443.1                                   |

**Table S5.** Summary of the synthesis method of the NiO<sub>x</sub> based (pristine and doped) HTL, PSC device structure, performance and device stability under different conditions for the inverted PSCs.

| HTL                      | Synthes<br>is<br>method | Device structure                                                                                                                                   | V <sub>OC</sub><br>(V) | J <sub>SC</sub><br>(mA/cm <sup>2</sup> ) | FF   | PCE<br>(%) | Stability         | Stored<br>environment     | Ref.             |
|--------------------------|-------------------------|----------------------------------------------------------------------------------------------------------------------------------------------------|------------------------|------------------------------------------|------|------------|-------------------|---------------------------|------------------|
| Cu: NiO <sub>x</sub>     | Sol-gel                 | ITO/Cu: NiO <sub>x</sub> /MAPbI <sub>3</sub> /PC <sub>61</sub> BM/bis-C <sub>60</sub> /Ag                                                          | 1.11                   | 19.01                                    | 0.73 | 15.40      | 90% for 240 h     | air                       | 6                |
| Cu: NiO <sub>x</sub>     | NP ink                  | ITO/Cu: NiO <sub>x</sub> /MAPbI <sub>3</sub> /C <sub>60</sub> /BCP/Ag                                                                              | 1.12                   | 22.28                                    | 0.81 | 20.26      | 95% for 1000 h    | 50–65% humidity           | 7                |
| Cu: NiO <sub>x</sub>     | DCMS                    | FTO/Cu: NiO <sub>x</sub> /MAPbI <sub>3</sub> /PCBM/Ag                                                                                              | 1.06                   | 20.79                                    | 0.67 | 14.88      | >90% for 10 days  | 30 °C, 60% humidity       | 8                |
| NiO                      | DCMS                    | FTO/NiO <sub>x</sub> /MAPbI <sub>3</sub> /PCBM/Ag                                                                                                  | 0.99                   | 18.76                                    | 0.57 | 10.54      | >90% for 10 days  | 30 °C, 60% humidity       | 8                |
| Cu: NiO <sub>x</sub>     | Sol-gel                 | FTO/bl-Cu: NiO <sub>x</sub> /mpCu: NiO <sub>x</sub> /MAPbI <sub>3</sub> /PCBM/bis-C <sub>60</sub> /Ag                                              | 1.11                   | 21.58                                    | 0.82 | 19.62      | >90% for 1000 h   | light                     | 9                |
| NiO                      | Sol-gel                 | FTO/bl-NiO <sub>x</sub> /MAPbI <sub>3</sub> /PCBM/bis-C <sub>60</sub> /Ag                                                                          | 1.10                   | 18.49                                    | 0.77 | 15.60      | >90% for 1000 h   | >90% for 1000 h           | 10               |
| Ag: NiO <sub>x</sub>     | Sol-gel                 | ITO/Ag: NiO <sub>x</sub> /MAPbI <sub>3</sub> /PC <sub>71</sub> BM/BCP/Ag                                                                           | 1.08                   | 19.70                                    | 0.80 | 16.86      | 60% for 30 days   | ~30% humidity             | 10               |
| NiO <sub>x</sub>         | Sol-gel                 | ITO/NiO <sub>x</sub> /MAPbI <sub>3</sub> /PC <sub>71</sub> BM/BCP/Ag                                                                               | 1.05                   | 17.52                                    | 0.72 | 13.24      | 60% for 30 days   | ~30% humidity             | 10               |
| Co: NiO <sub>x</sub>     | MS                      | FTO/Co: NiO <sub>x</sub> /MAPbI <sub>3</sub> /PCBM/Ag                                                                                              | 1.01                   | 20.02                                    | 0.63 | 12.63      | >90% for 10 days  | 30 °C, 60% humidity       | 11               |
| NiO <sub>x</sub>         | MS                      | FTO/NiO <sub>x</sub> /MAPbI <sub>3</sub> /PCBM/Ag                                                                                                  | 1.01                   | 18.80                                    | 0.55 | 9.60       | >90% for 10 days  | 30 °C, 60% humidity       | 11               |
| Zn: NiO <sub>x</sub>     | Sol-gel                 | FTO/Zn: NiO <sub>x</sub> /MAPbI <sub>3</sub> /PCBM/BCP/Ag                                                                                          | 1.10                   | 22.80                                    | 0.78 | 19.6       | 84.4% for 30 days | Dry air                   | 12               |
| Li: NiO <sub>x</sub>     | Sol-gel                 | ITO/Li: NiO <sub>x</sub> /MAPbI <sub>3</sub> /PCBM/Ag                                                                                              | 1.00                   | 20.89                                    | 0.74 | 15.41      | 84.4% for 480 h   | Glove box                 | 13               |
| Li: NiO <sub>x</sub>     | Sol-gel                 | FTO/Li: NiO <sub>x</sub> /MAPbI <sub>3</sub> /Cl <sub>2</sub> /PCBM/Ag                                                                             | 1.12                   | 21.79                                    | 0.74 | 18.00      | ~100% for 2 h     | 1 sun illumination        | 14               |
| NiMgO                    | MS                      | FTO/NiMgO/ MAPbI <sub>3</sub> /PCBM/ZnMgO/Al                                                                                                       | 1.08                   | 21.30                                    | 0.80 | 18.50      | ~90% for 600 h    | 50–70% humidity           | 15               |
| Sr: NiO <sub>x</sub>     | Sol-gel                 | FTO/Sr: NiO <sub>x</sub> /MAPbI <sub>3</sub> /PCBM/AgAl                                                                                            | 1.11                   | 22.73                                    | 0.79 | 20.05      | >60% for 100 days | 18% humidity              | 16               |
| NiO                      | Sol-gel                 | FTO/Sr: NiO <sub>x</sub> /MAPbI <sub>3</sub> /PCBM/AgAl                                                                                            | 1.05                   | 20.99                                    | 0.69 | 15.22      | ~32% for 100 days | 18% humidity              | 16               |
| Cs: NiO <sub>x</sub>     | Sol-gel                 | FTO/Cs: NiO <sub>x</sub> /MAPbI <sub>3</sub> /PCBM/ZrAcac/Ag                                                                                       | 1.12                   | 21.77                                    | 0.79 | 19.35      | ~90% for 80 days  | Argon glovebox            | 17               |
| Li, Ag: NiO <sub>x</sub> | Sol-gel                 | ITO/Li, Ag: NiO <sub>x</sub> /MAPbI <sub>3</sub> /PCBM/BCP/Ag                                                                                      | 1.13                   | 21.29                                    | 0.80 | 19.24      | 95% for 30 days   | 30 ± 2% humidity          | 18               |
| NiO                      | Sol-gel                 | ITO/NiO <sub>x</sub> /MAPbI <sub>3</sub> /PCBM/BCP/Ag                                                                                              | 1.08                   | 19.20                                    | 0.78 | 16.19      | 85% for 30 days   | 30 ± 2% humidity          | 18               |
| La: NiO <sub>x</sub>     | Sol-gel                 | FTO/La: NiO <sub>x</sub> /MAPbI <sub>3</sub> /PCBM/BCP/Ag                                                                                          | 1.01                   | 21.02                                    | 0.73 | 15.46      | 95% for 30 days   | Moisture-free             | 19               |
| NiO <sub>x</sub>         | ALD                     | FTO/ALDNiO <sub>x</sub> /Cs <sub>0.05</sub> MA <sub>0.95</sub> PbI <sub>3</sub> /PCBM/BCP/ALD-AZO/Ag                                               | 1.02                   | 20.53                                    | 0.73 | 16.27      | 95% after 500 h   | 20-60% humidity, 1 sun    | 20               |
| E-NiO <sub>x</sub>       | NP ink                  | ITO/NiO <sub>x</sub> /MAPbI <sub>3</sub> /PCBM/ Ti(Nb)O <sub>x</sub> /Ag                                                                           | 1.07                   | 21.88                                    | 0.79 | 18.49      | 90% after 500 h   | 85 °C, 85% RH             | 21               |
| NiO <sub>x</sub>         | NP ink                  | FTO/NiO <sub>x</sub> /MAPbI <sub>3</sub> /PCBM/Ag                                                                                                  | 1.09                   | 18.07                                    | 0.69 | 14.42      | 80% after 150 h   | 45-56 RH%                 | 22               |
| Li, Mg: NiO <sub>x</sub> | Spray                   | FTO/NiMgLiO/ MAPbI <sub>3</sub> /PCBM/TiNbO/Ag                                                                                                     | 1.08                   | 20.41                                    | 0.83 | 18.30      | >90% for 1000 h   | 1 Sun light soaking       | 1                |
| Li, Mg: NiO <sub>x</sub> | Spray                   | FTO/NiMgLiO/Cs <sub>0.05</sub> FA <sub>0.15</sub> MA <sub>0.85</sub> PbI <sub>3</sub> /PCBM/BCP/Ag                                                 | 1.08                   | 22.55                                    | 0.79 | 19.17      | ~100% for 30 days | Dark, 55% humidity        | 23               |
| Li, Mg: NiO <sub>x</sub> | Spray                   | FTO/NiMgLiO/ MAPbI <sub>3</sub> /PCBM/BCP/Ag                                                                                                       | 1.08                   | 21.75                                    | 0.75 | 17.60      | 30% for 15 days   | Dark, 55% humidity        | 23               |
| Li, Mg: NiO <sub>x</sub> | Spray                   | FTO/ NiMgLiO/ MAPbI <sub>3</sub> /Ti(Nb)O <sub>x</sub> /Ag                                                                                         | 1.19                   | 22.78                                    | 0.77 | 19.19      | 80% after 500 h   | <25% humidity, 85°C       | 24               |
| Li, Mg: NiO <sub>x</sub> | Spray                   | FTO/ NiMgLiO/FA <sub>0.85</sub> MA <sub>0.15</sub> Pb(I <sub>0.85</sub> Br <sub>0.85</sub> ) <sub>3</sub> /Ti(Nb)O <sub>x</sub> /Ag                | 1.08                   | 21.98                                    | 0.79 | 18.75      | 90% after 1000 h  | 1 sun light soaking       | 25               |
| Li, Mg: NiO <sub>x</sub> | Spray                   | FTO/NiO <sub>x</sub> /FAPbI <sub>3</sub> /PCBM/TiO <sub>x</sub> /Ag                                                                                | 1.10                   | 23.09                                    | 0.81 | 20.65      | 80% after 500h    | 85 °C                     | 26               |
| NiO                      | Spray                   | ITO/NiO/Cs <sub>17</sub> FA <sub>83</sub> Pb(Br <sub>17</sub> I <sub>83</sub> ) <sub>3</sub> /C <sub>60</sub> /BCP/Ag                              | 1.02                   | 19.7                                     | 0.76 | 16.2       | ~90% after 4000 h | N <sub>2</sub> atmosphere | 5                |
| NiO                      | Spray                   | ITO/NiO/Cs <sub>4</sub> (MA <sub>0.17</sub> FA <sub>0.83</sub> ) <sub>96</sub> Pb(I <sub>0.83</sub> Br <sub>0.17</sub> ) <sub>3</sub> /PCBM/ZnO/Ag | 1.06                   | 22.9                                     | 0.72 | 17.3       | >87% after 4500 h | N <sub>2</sub> atmosphere | <b>This work</b> |
|                          |                         | ITO/NiO/Cs <sub>4</sub> (MA <sub>0.17</sub> FA <sub>0.83</sub> ) <sub>96</sub> Pb(I <sub>0.83</sub> Br <sub>0.17</sub> ) <sub>3</sub> /PCBM/ZnO/Au | 1.06                   | 22.9                                     | 0.72 | 17.3       | >82% after 200 h  | 85 °C, 85% RH             |                  |

Note- DCMS- DC magnetron sputtering, ALD- Atomic layer deposition, MS- magnetron sputtering.

## References:

1. W. Chen, Y. Wu, Y. Yue, J. Liu, W. Zhang, X. Yang, H. Chen, E. Bi, I. Ashraful, M. Gratzel, L. Han, *Science*, 2015, **350**, 944-948.
2. M. Yin, F. Xie, H. Chen, X. Yang, F. Ye, E. Bi, Y. Wu, M. Cai and L. Han, *J. Mater. Chem. A*, 2016, **4**, 8548-8553.
3. W. Chen, Y. Wu, J. Liu, Ch. Qin, X. Yang, A. Islam, Y.-B. Cheng, L. Han, *Energy Environ. Sci.*, 2015, **8**, 629-640.
4. Y. Qin, J. Song, Q. Qiu, Y. Liu, Y. Zhao, L. Zhu, Y. Qiang, *J. Alloys. Compd.*, 2019, **810**, 151970.
5. W. J. Scheideler, N. Rolston, O. Zhao, J. Zhang, R. H. Dauskardt, *Adv. Energy Mater.*, 2019, **9**, 1803600.
6. J. H. Kim, P. W. Liang, S. T. Williams, N. Cho, C.C. Chueh, M. S. Glaz, D. S. Ginger, A. K. Y. Jen, *Adv. Mater.*, 2015, **27**, 695–701.
7. W. Chen, Y.H. Wu, J. Fan, A.B. Djurisic, F.Z. Liu, H.W. Tam, A. Ng, C. Surya, W. K. Chan, D. Wang, Z. B. He, *Adv. Energy Mater.*, 2018, **8**, 1703519.
8. A. B. Huang, L. Lei, Y. X. Chen, Y. Yu, Y. J. Zhou, Y. Liu, S.W. Yang, S. H. Bao, R. Li, P. Jin, *Sol. Energy Mater. Sol. Cells*, 2018, **182**, 128–135.
9. K. Yao, F. Li, Q.Q. He, X.F. Wang, Y.H. Jiang, H.T. Huang, A.K.Y. Jen, *Nano Energy*, 2017, **40**, 155–162.
10. Y. Wei, K. Yao, X.F. Wang, Y.H. Jiang, X.Y. Liu, N.G. Zhou, F. Li, *Appl. Surf. Sci.*, 2018, **427**, 782–790.
11. A. B. Huang, J. T. Zhu, J. Y. Zheng, Y. Yu, Y. Liu, S. W. Yang, S. H. Bao, L. Lei, P. Jin, *J. Mater. Chem. C*, 2016, **4**, 10839–10846.

12. Y. J. X. Wan, Z. Qiu, H. Zhang, X. Zhu, I. Sikandar, X. Liu, X. Chen, B. Cao, *ACS Appl. Energy Mater.*, 2018, **1**, 3947–3954.
13. M. A. Park, I.J. Park, S. Park, J. Kim, W. Jo, H. J. Son, J. Y. Kim, *Curr. Appl. Phys.*, 2018, **18**, S55–S59.
14. W. Y. Nie, H. H. Tsai, J. C. Blancon, F. Z. Liu, C. C. Stoumpos, B. Traore, M. Kepenekian, O. Durand, C. Katan, S. Tretiak, J. Crochet, P. M. Ajayan, M. G. Kanatzidis, J. Even, A. D. Mohite, *Adv. Mater.*, 2018, **30**, 170387.
15. G. J. Li, Y. B. Jiang, S. B. Deng, A. W. Tam, P. Xu, M. Wong, H. S. Kwok, *Adv. Sci.*, 2017, **4**, 1700463.
16. J. K. Zhang, W. J. Mao, X. Hou, J. J. Duan, J. P. Zhou, S. M. Huang, O. Y. Wei, X. H. Zhan, Z. Sun, X. H. Chen, *Sol. Energy*, 2018, **174**, 1133–1141.
17. W. Chen, F. Z. Liu, X. Y. Feng, A. B. Djuricic, W. K. Chan, Z. B. He, *Adv. Energy Mater.*, 2017, **7**, 1700722.
18. X. Xia, Y. Jiang, Q. Wan, X. Wang, L. Wang, F. Li, *ACS Appl. Mater. Interfaces*, 2018 **10 (51)**, 44501–44510.
19. S. Teo, Z. L. Guo, Z. Xu, C. Zhang, Y. Kamata, S. Hayase, T. Ma, *Chem. Sus. Chem.*, 2018, **12 (2)**, 518–526.
20. S. Seo, S. Jeong, C. Bae, N. G. Park, H. Shin, *Adv. Mater.*, **30**, 2018, 1801010.
21. J. He, E. Bi, W. Tang, Y. Wang, Z. Zhou, X. Yang, H. Chen, L. Han, *Sol. RRL*, 2018, **2**, 1800004.
22. G. D. Niu, S. Y. Wang, J. W. Li, W. Z. Li, L. D. Wang, *J. Mater. Chem. A*, 2018, **6**, 4721–4728.
23. X. Yin, M. Que, Y. Xing and W. Que, *J. Mater. Chem. A*, 2015, **3**, 24495–24503.

24. Y. Wu, F. Xie, H. Chen, X. Yang, H. Su, M. Cai, Z. Zhou, T. Noda, L. Han, *Adv. Mater.*, 2017, **29**, 1701073.
25. Y. Wu, X. Yang, W. Chen, Y. Yue, M. Cai, F. Xie, E. Bi , A. Islam, L. Han, *Nat. Energy*, 2016, **1**, 16148.
26. F. Xie, C.C. Chen, Y. Wu, X. Li, M. Cai, X. Liu, X. Yang, L. Han, *Energy Environ. Sci.*, 2017, **10**, 1942.
